# Supplementary material
Source: PubMed Central journal article supplement (PMC5499196)
Supplement: 939TableS2.pdf [file 939TableS2.pdf]

**Sup Table 2: Primers used for RNAi and cloning**

| <b>RNAi constructs</b>       | <b>Forward primer</b>                 | <b>Reverse Primer</b>             |
|------------------------------|---------------------------------------|-----------------------------------|
| <i>fbxb-41</i>               | 5'- actagtATGACTGTTGTGTCTTTGTTTCCC    | 5'- ctcgagCCACAGAGACCAAGATTGGTGTG |
| <i>alh-6</i>                 | 5'- actagtATGCTCTCATTCCGAGCTCGACGC    | 5'- CCATCGCGAACATCTCCAAGCTTG      |
| <i>unc-89</i>                | 5'- ACGTCTTCAATCACATGCCAAC            | 5'- CAATATCCCATCCACGGAAGCTTC      |
| <i>cec-10</i>                | 5'- CTCAACACACTACTTCACGGTGC           | 5'- CGAGGGGTTCCGGGCTTATTATG       |
| <i>F27C1.3</i>               | 5'- ATGATGAGCATGGAGTTATTTGG           | 5'- AGCTTTCTTCTTATCTGCACCG        |
| <i>F46F11.6</i>              | 5'- GAAGAGGCTGGATGGAAGCAC             | 5'- GCTGCTGTCTTGCAAGATCCTC        |
| <i>tyr-4</i>                 | 5'- CAGCTCCACGTCCAACACCTGC            | 5'- CAAGAGGTCCGGATCAAAAGATG       |
| <i>C48E7.6</i>               | 5'- CGACAATATGGTATCCACAGGG            | 5'- GTTGTACCCAACAAGTCGGGTGG       |
| <i>hrpk-1</i>                | 5'- ATGATGATCAAAGTGGGAGCCG            | 5'- CGGATGGAATCGTCACCTGCGC        |
| <i>pcbd-1</i>                | 5'- ATGCATTCTTCATATTCTCATTTTC         | 5'- CTACTTTTTAACAATCGATTTCG       |
| <i>dcp-66</i>                | 5'- CTGCAACCTAATGCTGACACAG            | 5'- CGAGAGAGGGGGAAATTAAGGG        |
| <i>apb-3</i>                 | 5'- ATCGCCCGTGCACTTGTCCGAC            | 5'- CATCATCTTCTTCTTCGTAC          |
| <i>mys-4</i>                 | 5'- GCGATGTCTCCCATGAAAACGC            | 5'- GAGTGAAGAGGTTCTTCGTATG        |
| <i>B0511.12</i>              | 5'- CCGTCTTCAGGTGCTCCAGGAGG           | 5'- GTCATGCAGGTAGCTCCGATG         |
| <i>skn-1(specific)</i>       | 5'- GACCGAGATGCAAGAGATGCGTG           | 5'- GATCGTTGGTAGCGTGATCCACTG      |
| <i>skr-1/2</i>               | 5'- TATCCGAGGCGGCAAAGGAACG            | 5'- CGCACCAGGCATTCTCTTTGCGG       |
| <b>Mutant rescue</b>         | <b>Primer</b>                         |                                   |
| <i>alh-6pF1</i>              | 5'- ATCTACGGAATGTAGATTCCCGGG          |                                   |
| <i>alh-6R3'</i>              | 5'- GGGCTCATCCTCAACCAGTCGCTC          |                                   |
| <i>F46F11.6pF</i>            | 5'- catggtcaatataaacctcacc            |                                   |
| <i>F46F11.6R(3UTR)</i>       | 5'- CTAGGAAACATCTGGAAGTCAAC           |                                   |
| <i>skn-1F1(Out)</i>          | 5'- ggcctcgtgtcgtcgttcacgcg           |                                   |
| <i>skn-1R2(Out)</i>          | 5'- gtggggattgaagtgggtgagg            |                                   |
| <b>mCherry tagged</b>        | <b>Primer</b>                         |                                   |
| <i>alh-6pF1</i>              | 5'- ATCTACGGAATGTAGATTCCCGGG          |                                   |
| <i>alh-6LR3end</i>           | 5'- AGCGGCCGCTTCCATTGATGGATATTTCCAGTC |                                   |
| <i>F46F11.6pF(Sall)1</i>     | 5'- GTCGACTgagcatcgattggctgggctcc     |                                   |
| <i>F46F11.6CR(NotI)mChe1</i> | 5'- gcggccgcAACTCTTTGCTGCTGTCTTGCAAG  |                                   |
| <b>Ectopic xrep-4</b>        | <b>Primer</b>                         |                                   |
| <i>F46F11.6F(SacII)</i>      | 5'- ccgcggaATGGCACTGGAAGAAATAATG      |                                   |
| <i>F46F11.6R(3UTR)</i>       | 5'- CTAGGAAACATCTGGAAGTCAAC           |                                   |
| <i>myo-3pF(BamHI)</i>        | 5'- ggatccGTGCCATAGTTTTACATTCCAC      |                                   |
| <i>myo-3pR(SacII)</i>        | 5'- ccgcggtctagatggatctagtggtcgtgg    |                                   |
| <i>pho-1pF(BamHI)</i>        | 5'- GGATCcgcttattcagcagtgagtttgc      |                                   |
| <i>pho-1pR(SacII)</i>        | 5'- CCGCGgtaaaagttaccctgaaaatgcgg     |                                   |
